# Supplementary material for: Bombyx batryticatus Protein-Rich Extract Induces Maturation of Dendritic Cells and Th1 Polarization: A Potential Immunological Adjuvant for Cancer Vaccine
Source: MDPI journal article supplement (doi:10.3390/molecules26020476), 2021-01-18
Supplement: s1 [file s1]

# Supplementary materials: *Bombyx batryticatus* protein-rich extract induces maturation of dendritic cells and Th1-polarization: A potential immunological adjuvant for cancer vaccine

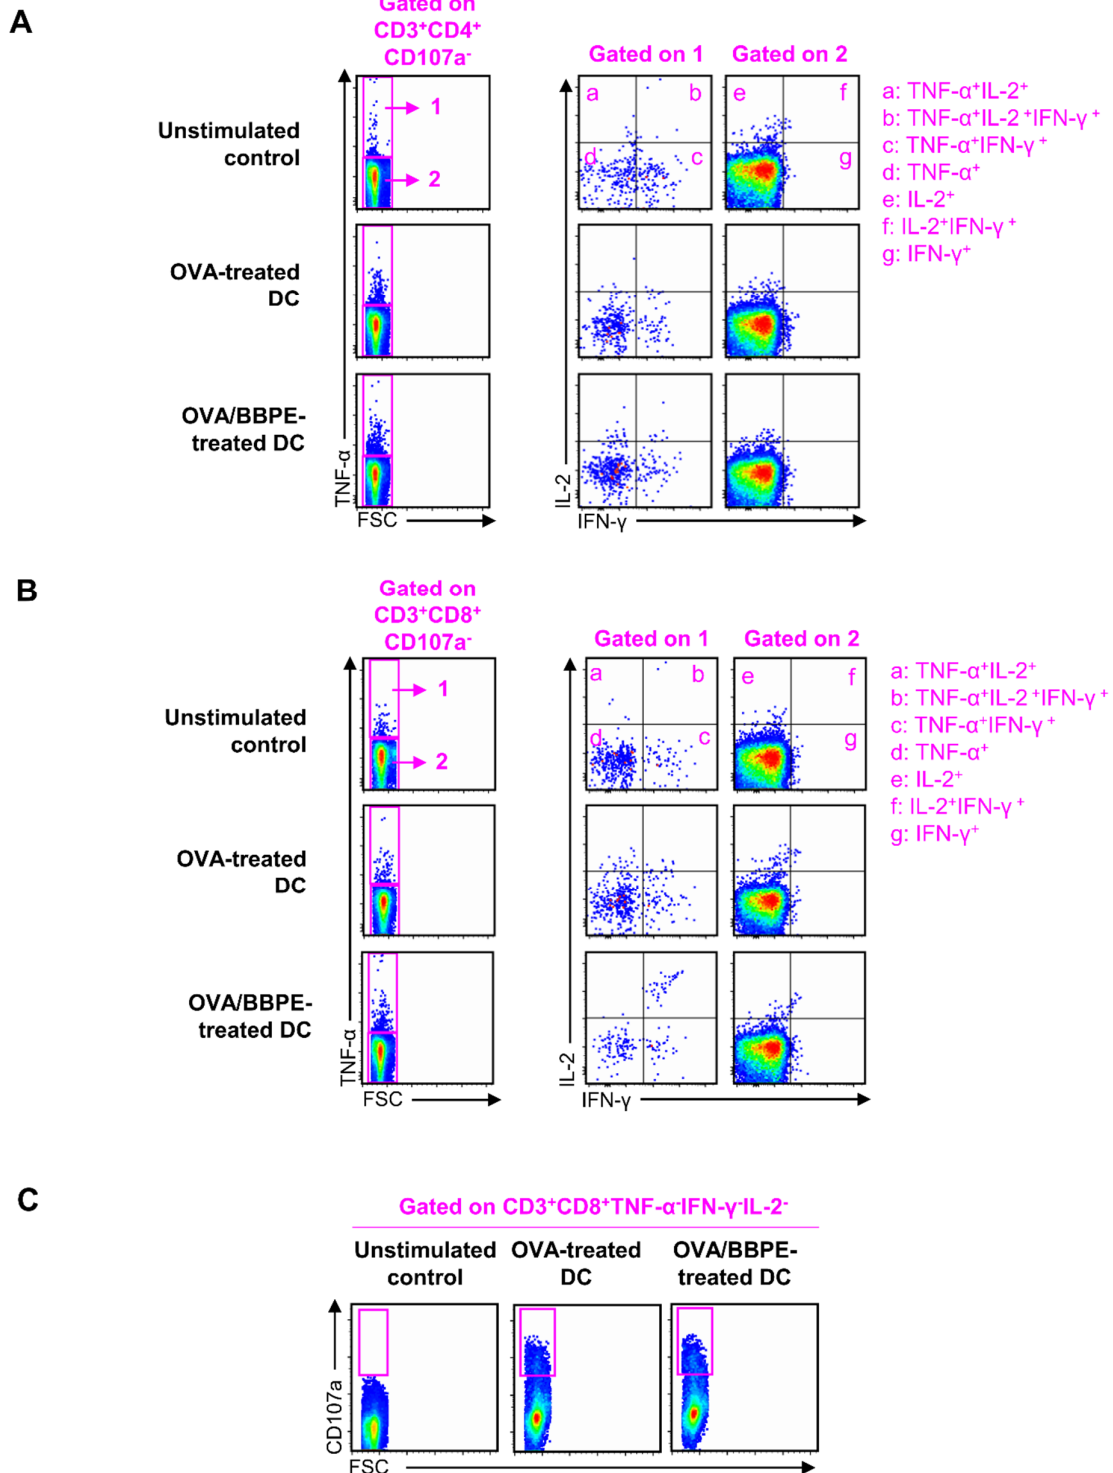

**Figure S1.** Example gating strategies for flow cytometry analysis for multifunctional T cells. Multifunctional-, bifunctional T cells, or each single cytokine producing T cells were gated in CD3<sup>+</sup>CD4<sup>+</sup> (A) or CD3<sup>+</sup>CD8<sup>+</sup> cells. CD107a (a cytotoxic granule)-producing cells were gated in CD3<sup>+</sup>CD8<sup>+</sup>TNF- $\alpha$ <sup>+</sup>IFN- $\gamma$ <sup>+</sup>IL-2<sup>+</sup> cells (C).

## [CD4<sup>+</sup> T cell population in un-stimulated cells]

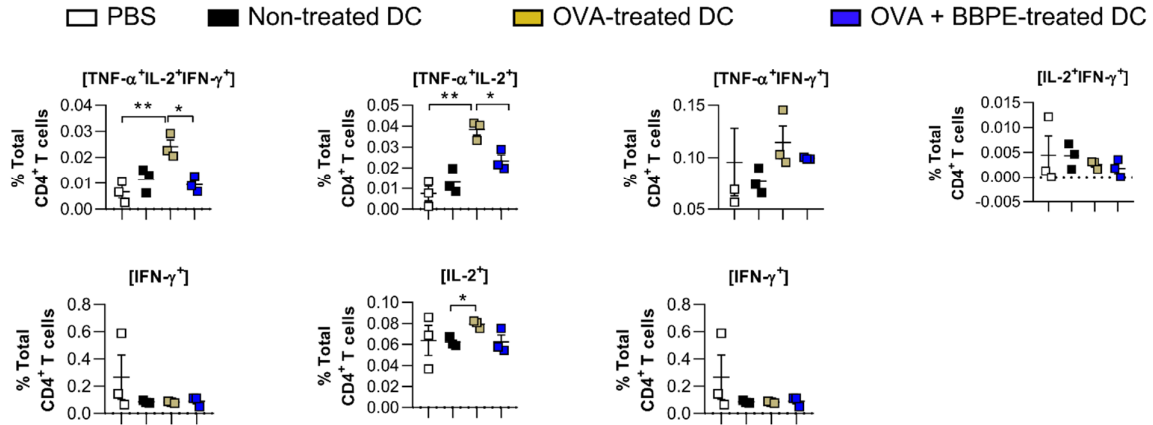

## [CD8<sup>+</sup> T cell population in un-stimulated cells]

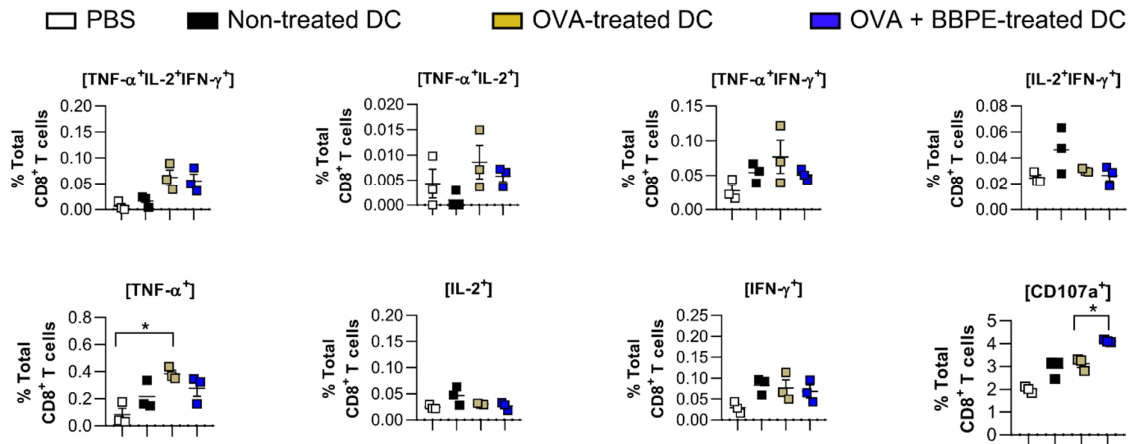

Figure S2. Percentage of multi-, bifunctional, or each single cytokine production in unstimulated cells gated on CD3<sup>+</sup>CD4<sup>+</sup> (A) or CD3<sup>+</sup>CD8<sup>+</sup> cells. All graphs show the mean  $\pm$  SD. Statistical analysis was performed using one-way ANOVA followed by Tukey's post-hoc test. \* $p < 0.05$  and \*\* $p < 0.01$  represent significant differences.
